# Supplementary material for: Optimizing malaria vector control in the Greater Mekong Subregion: a systematic review and mathematical modelling study to identify desirable intervention characteristics
Source: PubMed Central journal article supplement (PMC10981350; doi:10.1186/s13071-024-06234-4), 2024-03-29
Supplement: 13071_2024_6234_MOESM3_ESM.pdf [file 13071_2024_6234_MOESM3_ESM.pdf]

# Optimizing malaria vector control in the Greater Mekong Subregion: A systematic review and mathematical modelling study to identify desirable intervention characteristics

Yuqian Wang<sup>1,2</sup>, Nakul Chitnis<sup>1,2</sup>, and Emma L Fairbanks<sup>1,2</sup>

<sup>1</sup>Department of Epidemiology and Public Health, Swiss Tropical and Public Health Institute, Kreuzstrasse 2, 4123 Allschwil, Basel, Switzerland

<sup>2</sup>University of Basel, Petersplatz 1, 4001, Basel, Switzerland

\*Corresponding author: [emma.fairbanks@unibas.ch](mailto:emma.fairbanks@unibas.ch)

# 1 Equations in the intervention model

We use an *Anopheles* feeding cycle model first described in Chitnis et al. [1] and Briët et al. [2]. The framework for intervention effects has previously been utilized and described in Denz et al. [3] and Fairbanks et al. [4]. Here we provide an overview of these frameworks. A detailed description of parameters are listed in Table S1.

Vectorial capacity are calculated as

$$\Psi_{ij} = \underbrace{\frac{\Psi_{ij}^{(A)}}{1 - P_A - P_{df}}}_{N_{v0}} \times \underbrace{\frac{\Psi_{ij}^{(B)} P_{A_j} P_{B_j} P_{C_j} P_{D_j} P_{E_j}}{N_j}}_{N_j} \times \underbrace{\left[ \left( \sum_{h=0}^{k_+} \binom{\theta_s - (h+1)\tau + h}{h} P_A^{\theta_s - (h+1)\tau} P_{df}^h \right)}_{\Psi_{ij}^{(C)} \dots} \right] + \underbrace{\left[ \sum_{l=1}^{\tau-1} \left( \sum_{h=0}^{k_{l+}} \binom{(\theta_s + l) - (h+2)\tau + h}{h} P_A^{(\theta_s + l) - (h+2)\tau} P_{df}^{h+1} \right) \right]}_{\dots \Psi_{ij}^{(C)}} \times \underbrace{\frac{P_{A^i} P_{B_i}}{1 - P_A - P_{df}}}_{\Psi_{ij}^{(D)}}. \quad (1)$$

In the vectorial capacity equation,  $\Psi_{ij}^{(A)}$  represents the number of mosquitoes seeking for a host in a single day,  $\Psi_{ij}^{(B)}$  indicates the probability of mosquitoes bite a type j host during that day and live through a feeding cycle,  $\Psi_{ij}^{(C)}$  is the probability of mosquitoes survive enough time to become infective, and the total number of potential bite on type i host is calculated as  $\Psi_{ij}^{(D)}$  [1].

The host availability rates are calculated as

$$\alpha_i = \frac{1}{N_i} \left( \frac{P_{A^i}}{1 - P_A} \right) \left( \frac{-\ln P_A}{\theta_d} \right). \quad (2)$$

Derivation of host availability rate can be found in Additional file 2 in Briët et al. [2].

Then we can consider the intervention effects as

## Host availability rate of protected hosts:

$$(1 - \min(\beta_r + \beta_m + \beta_d, 1)) \times \alpha_{Hb},$$

where  $\alpha_{Hb}$  is the availability rate of a human host not protected by the intervention,  $\beta_r$  is the repelling effect,  $\beta_m$  preprandial killing effect, and  $\beta_d$  is the disarming effect. The reduction in biting is set to a maximum of 1, since the host availability rate is larger than or equal to 0.

**Probability of surviving to lay eggs after biting a protected human host:**

$$(1 - \xi) \times P_c,$$

where  $P_c$  is the probability for a mosquito that finds a resting place after biting a unprotected human host and  $\xi$  is the probability a mosquitoes, which would have survived biting a human host without the intervention, dies postprandially if they bite a protected host.

**Rate of disarming or preprandial killing:** This is modelled as a dummy host, which does not contribute to malaria transmission, with an availability rate of

$$(\beta_m + \beta_d) \times \alpha_{Hb}. \quad (3)$$

**Probability of surviving to lay eggs, given the mosquito is preprandially killed or disarmed:**

$$\left( \frac{\beta_d}{\beta_d + \beta_m} \right).$$

## References

- [1] N Chitnis, T Smith, and R Steketee. A mathematical model for the dynamics of malaria in mosquitoes feeding on a heterogeneous host population. *Journal of Biological Dynamics*, 2(3):259–285, 2008. doi: 10.1080/17513750701769857.
- [2] OJT Briët, DE Impoinvil, N Chitnis, E Pothin, JF Lemoine, J Frederic, and TA Smith. Models of effectiveness of interventions against malaria transmitted by *Anopheles albimanus*. *Malaria journal*, 18(1):263, 2019. doi: 10.1186/s12936-019-2899-3.
- [3] A Denz, MM Njoroge, MM Tambwe, C Champagne, F Okumu, JJA van Loon, A Hiscox, A Saddler, U Fillinger, SJ Moore, and N Chitnis. Predicting the impact of outdoor vector control interventions on malaria transmission intensity from semi-field studies. *Parasites & Vectors*, 14(1):64, 2021. doi: 10.1186/s13071-020-04560-x.
- [4] EL Fairbanks, M Saeung, A Pongsiri, E Vajda, Y Wang, DJ McIver, JH Richardson, A Tatarsky, NF Lobo, SJ Moore, A Ponlawat, T Chareonviriyaphap, A Ross, and N Chitnis. Inference for entomological semi-field experiments: Fitting a mathematical model assessing personal and community protection of vector-control interventions. *Comput Biol Med*, 168:107716, 2024. doi: 10.1016/j.compbimed.2023.107716.

Table S1: Detailed parameter definition, default value and range of vectorial capacity model and intervention model.

| Symbol                  | Parameter definition                                                                                    | Default value | Range        | Ref. |
|-------------------------|---------------------------------------------------------------------------------------------------------|---------------|--------------|------|
| Bionomic parameters     |                                                                                                         |               |              |      |
| $\chi$                  | Human blood index                                                                                       | 0.5           | (0.01, 1)    |      |
| $M$                     | Parity proportion                                                                                       | 0.5           | (0.39, 0.78) |      |
| $A_0$                   | Sac proportion                                                                                          | 0.5           | (0.16, 0.88) |      |
| $\tau$                  | Resting period duration                                                                                 | 3 days        | (2, 6)       |      |
| Standard parameters     |                                                                                                         |               |              |      |
| $\theta_d$              | Maximum time a mosquito unsuccessfully searches for a blood meal per day                                | 0.33 days     |              | [2]  |
| $\theta_s$              | Duration of the extrinsic incubation period                                                             | 10 days       |              | [2]  |
| $P_B$                   | Probability that a mosquito bites after encountering a host                                             | 0.95          |              | [2]  |
| $P_C$                   | Probability that a mosquito finds a resting place after biting                                          | 0.95          |              | [2]  |
| $P_D$                   | Probability that a mosquito survives the resting phase                                                  | 0.99          |              | [2]  |
| $P_E$                   | Probability that a mosquito lays eggs and returns to host-seeking                                       | 0.88          |              | [2]  |
| $N$                     | Total number of hosts                                                                                   | 1000          |              |      |
| $N_{v0}$                | Total number of emerging mosquitoes that survive to seek for blood meal each day                        |               |              |      |
| Derived parameters      |                                                                                                         |               |              |      |
| $P_A$                   | Probability of a mosquito that does not find a host or die after searching for blood meal for one night |               |              |      |
| $P_{A^i}$               | Probability of a mosquito finds a type i host during one night blood meal search                        |               |              |      |
| $P_{df}$                | Probability of a mosquito encounters a host and live through the whole feeding cycle                    |               |              |      |
| $P_f$                   | Probability of a mosquito lives through a feeding cycle                                                 |               |              |      |
| Intervention parameters |                                                                                                         |               |              |      |
| $\beta_r$               | Repelling effect                                                                                        |               | (0, 0.6)     | [4]  |
| $\beta_d$               | Disarming effect                                                                                        |               | (0, 0.6)     | [4]  |
| $\beta_m$               | Preprandal killing effect                                                                               |               | (0, 0.6)     | [4]  |
| $\xi$                   | Postprandal killing effect                                                                              |               | (0, 0.4)     | [4]  |

## 2 Geographical distribution figures

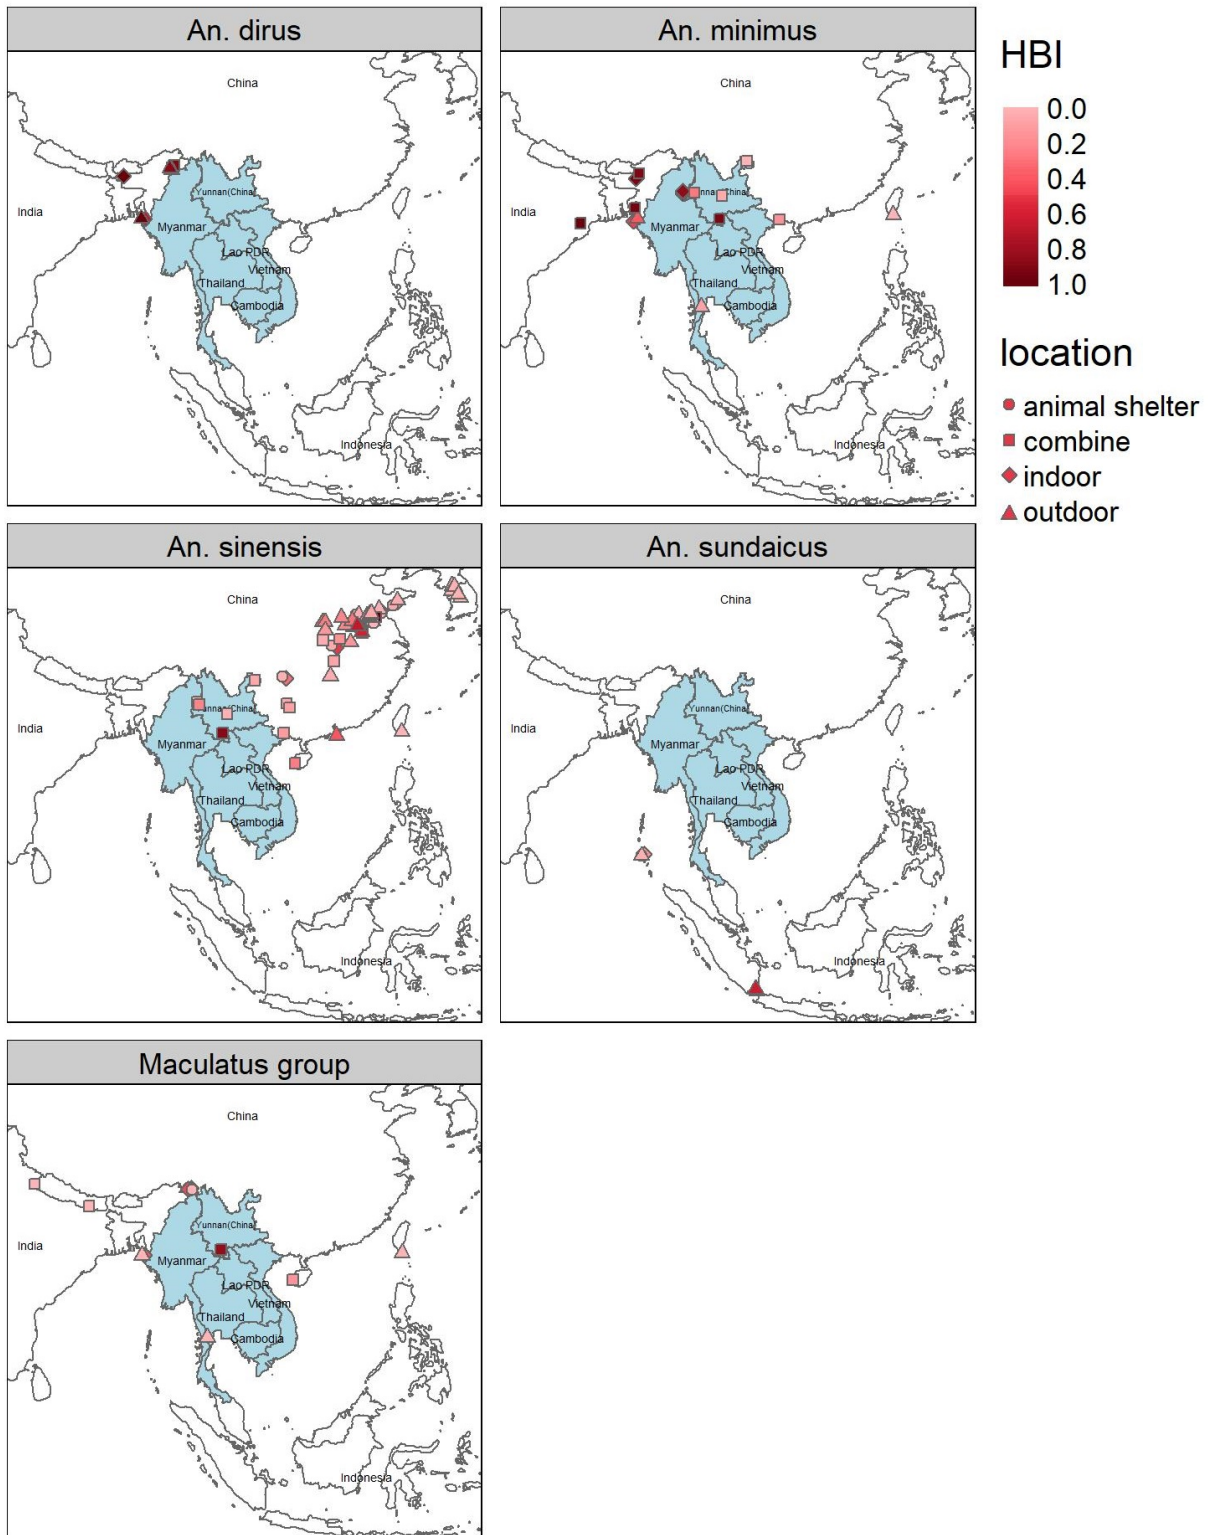

Figure S1: Geographic distribution of HBI data points for different species complexes

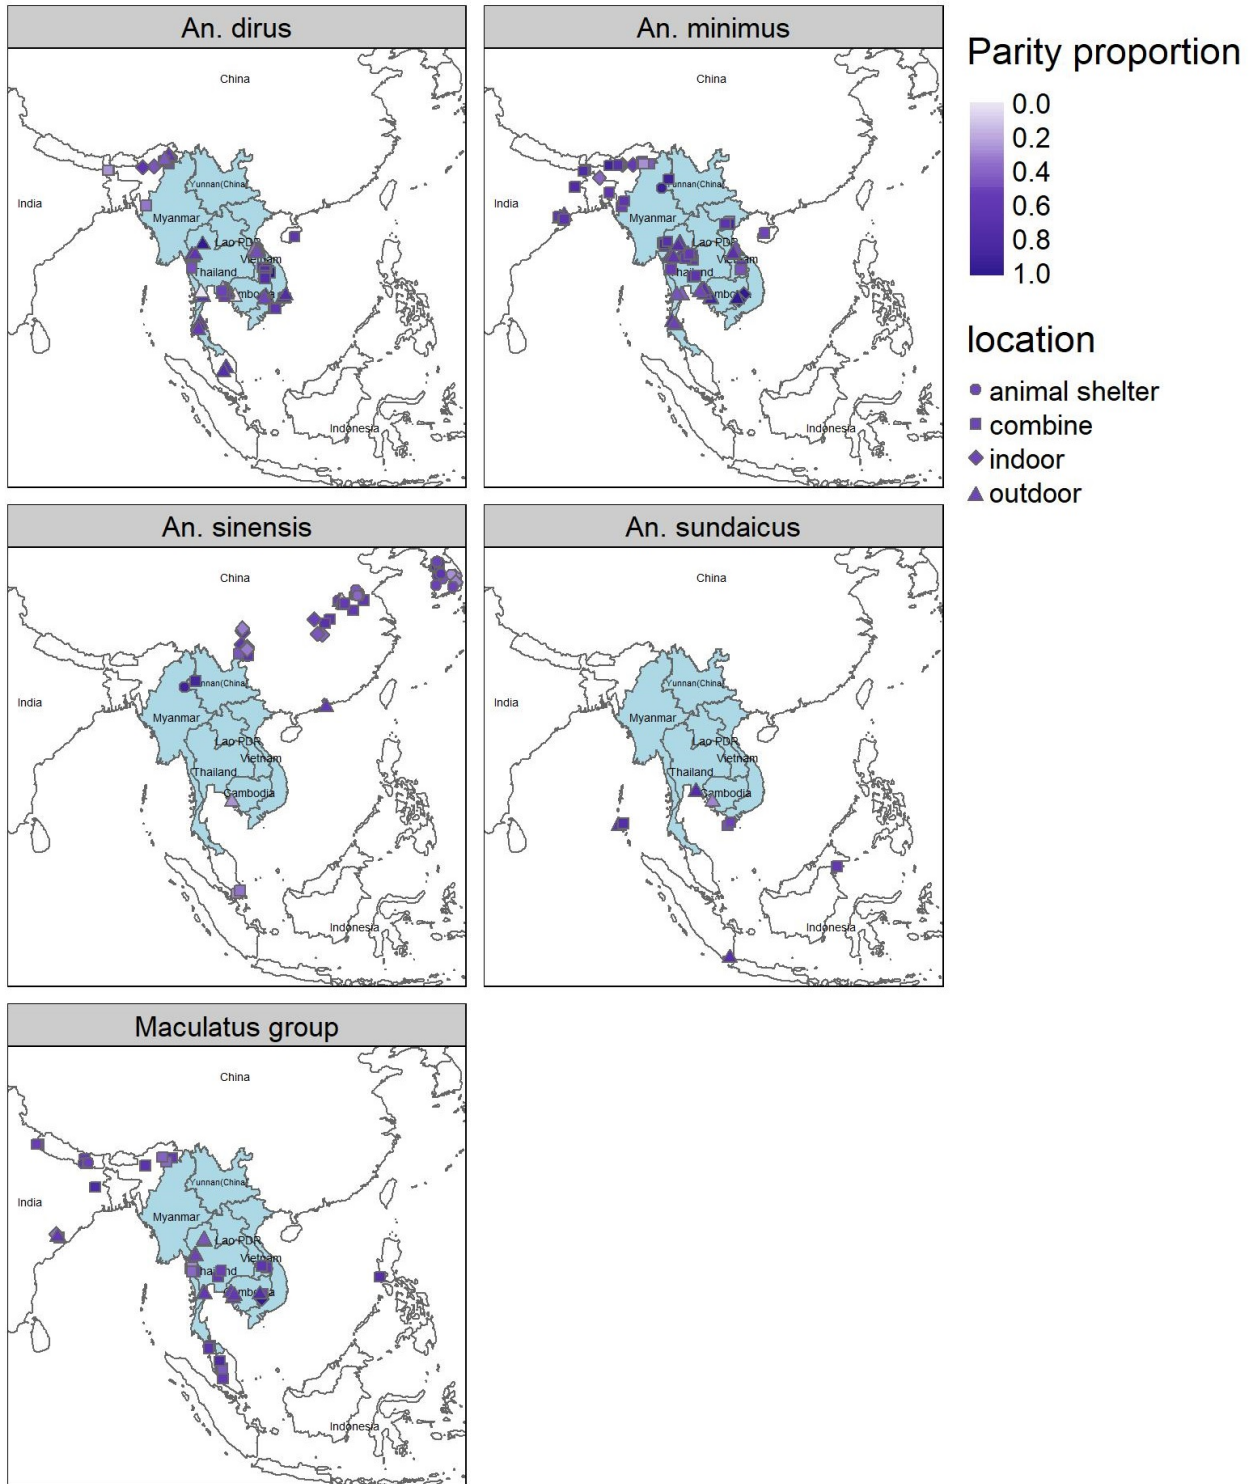

Figure S2: Geographic distribution of parity proportion data points for different species complexes

### 3 Parity rate logistic regression results

Table S2: Univariate and multivariate regression results for parity proportion.

| Variable        |                               | OR (univariate)           | OR (multivariate)         |
|-----------------|-------------------------------|---------------------------|---------------------------|
| Species complex | Maculatus group               | -                         | -                         |
|                 | <i>An. dirus</i>              | 1.72 (1.65–1.79, p<0.001) | 1.18 (1.06–1.30, p=0.002) |
|                 | <i>An. minimus</i>            | 1.40 (1.36–1.45, p<0.001) | 1.91 (1.70–2.15, p<0.001) |
|                 | <i>An. sinensis</i>           | 1.28 (1.24–1.32, p<0.001) | 1.10 (1.02–1.19, p=0.017) |
|                 | <i>An. sundaicus</i>          | 1.37 (1.30–1.45, p<0.001) | 1.21 (1.12–1.32, p<0.001) |
| Insecticide     | No                            | -                         | -                         |
|                 | Yes                           | 0.87 (0.85–0.89, p<0.001) | 0.82 (0.79–0.85, p<0.001) |
| Season          | Dry                           | -                         | -                         |
|                 | Rainy                         | 0.86 (0.83–0.89, p<0.001) | 0.99 (0.94–1.03, p=0.509) |
|                 | Both                          | 0.80 (0.77–0.83, p<0.001) | 0.92 (0.87–0.96, p<0.001) |
| Location        | Indoor                        | -                         | -                         |
|                 | Animal shelter                | 1.48 (1.39–1.58, p<0.001) | 1.33 (1.20–1.46, p<0.001) |
|                 | Combined                      | 1.09 (1.05–1.14, p<0.001) | 1.10 (1.04–1.17, p<0.001) |
|                 | Outdoor                       | 1.48 (1.42–1.55, p<0.001) | 1.24 (1.15–1.32, p<0.001) |
| Method          | Biting (whole night)          | -                         | -                         |
|                 | Biting (half night)           | 1.13 (1.07–1.19, p<0.001) | 0.82(0.77–0.88, p<0.001)  |
|                 | Combined                      | 0.98 (0.95–1.00, p=0.079) | 1.20 (1.13–1.26, p<0.001) |
|                 | Light trap                    | 1.30 (1.24–1.37, p<0.001) | 1.18 (1.08–1.28, p<0.001) |
|                 | Odour trap                    | 1.03 (0.94–1.13, p=0.552) | 0.48 (0.17–1.33, p=0.158) |
|                 | Resting                       | 0.92 (0.88–0.96, p<0.001) | 1.00 (0.94–1.07, p=0.958) |
| Land use        | Herb                          | -                         | -                         |
|                 | Cropland                      | 0.82 (0.79–0.85, p<0.001) | 1.18 (1.09–1.27, p<0.001) |
|                 | Forest                        | 0.81 (0.79–0.84, p<0.001) | 1.22 (1.14–1.31, p<0.001) |
|                 | Forest/cropland               | 0.85 (0.81–0.89, p<0.001) | 1.17 (1.08–1.26, p<0.001) |
|                 | Urban                         | 0.71 (0.63–0.80, p<0.001) | 1.16 (0.90–1.49, p=0.258) |
| Climate         | Temperate                     | -                         | -                         |
|                 | Cold                          | 1.33 (1.28–1.37, p<0.001) | 1.09 (1.03–1.16, p=0.005) |
|                 | Tropical                      | 1.21 (1.18–1.25, p<0.001) | 1.17 (1.08–1.27, p<0.001) |
|                 | <i>An. dirus</i> :tropical    |                           | 1.57 (1.40–1.77, p<0.001) |
|                 | <i>An. minimus</i> :tropical  |                           | 0.72 (0.64–0.81, p<0.001) |
|                 | <i>An. sinensis</i> :tropical |                           | 0.36 (0.25–0.51, p<0.001) |

## 4 Sensitivity analysis results

Table S3: Sobol's second order index

| Parameters                | Index (95% confidence interval) |
|---------------------------|---------------------------------|
| HBI . parity              | 0.14 (0.10–0.18)                |
| HBI . sac                 | 0.00 (-0.01–0.01)               |
| HBI . resting duration    | 0.06 (0.04–0.09)                |
| Parity . sac              | 0.05 (-0.02–0.14)               |
| Parity . resting duration | 0.09 (0.05–0.13)                |
| Sac . resting duration    | 0.05 (0.02–0.07)                |
